# Supplementary material for: Dual Effect of PER2 C111G Polymorphism on Cognitive Functions across Progression from Subjective Cognitive Decline to Mild Cognitive Impairment
Source: MDPI journal article supplement (doi:10.3390/diagnostics11040718), 2021-04-18
Supplement: s1 [file s1]

**Table S1.** Comparison neuropsychological z-scores between G carriers and G non-carriers

| Tests                                  | G non-carriers | G carriers   | p     |
|----------------------------------------|----------------|--------------|-------|
| N                                      | 36             | 9            |       |
| Five Words Acquisition                 | 0.10 (1.45)    | 0.10 (1.58)  | 0.748 |
| Five Words Recall after 10 minutes     | 0.21 (1.58)    | 0.64 (1.58)  | 0.856 |
| Five Words Recall after 24 hours       | -0.08 (0.95)   | -0.08 (0.50) | 0.625 |
| Paired Words Acquisition               | 0.68 (2.00)    | -0.12 (1.20) | 0.104 |
| Paired Words Recall after 10 minutes   | 1.00 (0.71)    | 1.00 (1.43)  | 0.586 |
| Paired Words Recall after 24 hours     | 0.23 (1.61)    | -0.09 (1.61) | 0.944 |
| Babcock short story                    | 0.21 (0.89)    | -0.26 (1.55) | 0.232 |
| Babcock short story recall             | 0.96 (0.95)    | -0.44 (2.10) | 0.306 |
| Digit Span                             | -0.54 (1.83)   | -0.77 (2.29) | 0.944 |
| Corsi Tapping Test                     | -1.27 (2.29)   | -1.27 (1.83) | 0.548 |
| Trail Making test part A               | 0.41 (0.85)    | 0.77 (1.28)  | 0.148 |
| Trail Making test part B               | 0.55 (0.54)    | 1.09 (0.61)  | 0.148 |
| Trail Making test B-A                  | 0.62 (0.54)    | 0.97 (0.72)  | 0.252 |
| Token test                             | 0.41 (0.62)    | 0.72 (0.78)  | 0.131 |
| Phonemic Fluency Test                  | -0.15 (1.23)   | 0.43 (0.70)  | 0.081 |
| Rey-Osterrieth complex figure - copy   | 0.81 (0.56)    | 0.37 (0.55)  | 0.472 |
| Rey-Osterrieth complex figure - recall | 0.46 (1.04)    | 0.01 (1.35)  | 0.224 |

Values quoted in the table are medians and interquartile ranges (IQR). *p* indicates level of significance for comparison between G carriers and G non-carriers (statistical significance at the  $p < 0.05$ ).
